# Supplementary material for: A Survey of Patients’ Perspectives on Outpatient HIV Care in the Netherlands
Source: Springer Nature journal article supplement (doi:10.1007/s40121-017-0164-z), 2017-07-04
Supplement: MOESM1 [file 12843904]

The ATHENA database is maintained by Stichting HIV Monitoring and supported by a grant from the Dutch Ministry of Health, Welfare and Sport through the Centre for Infectious Disease Control of the National Institute for Public Health and the Environment.

## CLINICAL CENTRES

*\* denotes site coordinating physician*

**Academic Medical Centre of the University of Amsterdam (AMC-UvA):** *HIV treating physicians:* M. van der Valk\*, S.E. Geerlings, M.H. Godfried, A. Goorhuis, J.W. Hovius, J.T.M. van der Meer, T.W. Kuijpers, F.J.B. Nellen, D. Pajkrt, T. van der Poll, J.M. Prins, P. Reiss, H.J. Scherpbier, M. van Vugt, W.J. Wiersinga, F.W.M.N. Wit. *HIV nurse consultants:* M. van Duinen, J. van Eden, A.M.H. van Hes, M. Mutschelknauss, H.E. Nobel, F.J.J. Pijnappel, A.M. Weijsenfeld. *HIV clinical virologists/chemists:* S. Jurriaans, N.K.T. Back, H.L. Zaaier, B. Berkhout, M.T.E. Cornelissen, C.J. Schinkel, K.C. Wolthers. **Emma Kinderziekenhuis (AMC-UvA):** *HIV nurse consultants:* A. van der Plas, A.M. Weijsenfeld. **Admiraal De Ruyter Ziekenhuis, Goes:** *HIV treating physicians:* M. van den Berge, A. Stegeman. *HIV nurse consultants:* S. Baas, L. Hage de Loeff. *HIV clinical virologists/chemists:* B. Wintermans, J. Veenemans. **Catharina Ziekenhuis, Eindhoven:** *HIV treating physicians:* M.J.H. Pronk\*, H.S.M. Ammerlaan. *HIV nurse consultants:* E.S. de Munnik, H.A.M. van Beek. *HIV clinical virologists/chemists:* A.R. Jansz, J. Tjhe, M.C.A. Wegdam, B. Deiman, V. Scharnhorst. **Elisabeth-TweeSteden Ziekenhuis, Tilburg:** *HIV treating physicians:* M.E.E. van Kasteren\*, A.E. Brouwer. *HIV nurse consultants:* R. van Erve, B.A.F.M. de Kruijf-van de Wiel, S.Keelan-Pfaf, B. van der Ven. *Data collection:* B.A.F.M. de Kruijf-van de Wiel, B. van der Ven. *HIV clinical virologists/chemists:* A.G.M. Buiting, P.J. Kabel, D.Versteeg. **Erasmus MC, Rotterdam:** *HIV treating physicians:* M.E. van der Ende\*, H.I. Bax, E.C.M. van Gorp, J.L. Nouwen, B.J.A. Rijnders, C.A.M. Schurink, A. Verbon, T.E.M.S. de Vries-Sluijs, N.C. de Jong-Peltenburg. *HIV nurse consultants:* N. Bassant, J.E.A. van Beek, M. Vriesde, L.M. van Zonneveld. *Data collection:* H.J. van den Berg-Cameron, J. de Groot, M. de Zeeuw-de Man. *HIV clinical virologists/chemists:* C.A.B. Boucher, M.P.G Koopmans, J.J.A van Kampen, S.D. Pas. **Erasmus MC–Sophia, Rotterdam:** *HIV treating physicians:* P.L.A. Fraaij, A.M.C. van Rossum, C.L. Vermont. *HIV nurse consultants:* L.C. van der Knaap, E. Visser. **Flevoziekenhuis, Almere:** *HIV treating physicians:* J. Branger\*, A. Rijkeboer-Mes. *HIV nurse consultant:* C.J.H.M. Duijf-van de Ven. **HagaZiekenhuis, Den Haag:** *HIV treating physicians:* E.F. Schippers\*, C. van Nieuwkoop. *HIV nurse consultants:* J.M. van IJperen, J. Geilings. *Data collection:* G. van der Hut. *HIV clinical virologist/chemist:* N.D. van Burgel. **Hiv Focus Centrum (DC Klinieken):** *HIV treating physicians:* A. van Eeden\*. *HIV nurse consultants:* W. Brokking, M. Groot, L.J.M. Elsenburg. *HIV clinical virologists/chemists:* M. Damen, I.S. Kwa. **HMC (Haaglanden Medisch Centrum), Den Haag:** *HIV treating physicians:* E.M.S. Leyten\*, L.B.S. Gelinck. *HIV nurse consultants:* A.Y. van Hartingsveld, C. Meerkerk, G.S. Wildenbeest. *HIV clinical virologists/chemists:* E. Heikens. **Isala, Zwolle:** *HIV treating physicians:* P.H.P. Groeneveld\*, J.W. Bouwhuis, A.J.J. Lammers. *HIV nurse consultants:* S. Kraan, A.G.W. van Hulzen. *Data collection:* G.L. van der Bliet, P.C.J. Bor. *HIV clinical virologists/chemists:* P. Bloembergen, M.J.H.M. Wolfhagen, G.J.H.M. Ruijs. **Leids Universitair Medisch Centrum, Leiden:** *HIV treating physicians:* F.P. Kroon\*, M.G.J. de Boer, H. Scheper, H. Jolink, A.M. Vollaard. *HIV nurse consultants:* W. Dorama, N. van Holten. *HIV clinical virologists/chemists:* E.C.J. Claas, E. Wessels. **Maasstad Ziekenhuis, Rotterdam:** *HIV treating physicians:* J.G. den Hollander\*, K. Pogany, A. Roukens. *HIV*

nurse consultants: M. Kastelijns, J.V. Smit, E. Smit, D. Struik-Kalkman, C. Tearno. *Data collection*: T. van Niekerk. *HIV clinical virologists/chemists*: O. Pontesilli. **Maastricht UMC+, Maastricht**: *HIV treating physicians*: S.H. Lowe\*, A.M.L. Oude Lashof, D. Posthouwer. *HIV nurse consultants*: R.P. Ackens, K. Burgers, J. Schippers. *Data collection*: B. Weijenberg-Maes. *HIV clinical virologists/chemists*: I.H.M. van Loo, T.R.A. Havenith. **MC Slotervaart, Amsterdam**: *HIV treating physicians*: J.W. Mulder\*, S.M.E. Vrouwenraets, F.N. Lauw. *HIV nurse consultants*: M.C. van Broekhuizen, D.J. Vlasblom. *HIV clinical virologists/chemists*: P.H.M. Smits. **MC Zuiderzee, Lelystad**: *HIV treating physicians*: S. Weijer\*, R. El Moussaoui. *HIV nurse consultant*: A.S. Bosma. **Medisch Centrum Leeuwarden, Leeuwarden**: *HIV treating physicians*: M.G.A.van Vonderen\*, D.P.F. van Houte, L.M. Kampschreur. *HIV nurse consultants*: K. Dijkstra, S. Faber. *HIV clinical virologists/chemists*: J. Weel. **Medisch Spectrum Twente, Enschede**: *HIV treating physicians*: G.J. Kootstra\*, C.E. Delsing. *HIV nurse consultants*: M. van der Burg-van de Plas, H. Heins. *Data collection*: E. Lucas. **Noordwest Ziekenhuisgroep, Alkmaar**: *HIV treating physicians*: W. Kortmann\*, G. van Twillert\*, B.M.W. Diederens, R. Renckens. *HIV nurse consultant and data collection*: D. Ruiten-Pronk, F.A. van Truijen-Oud. *HIV clinical virologists/chemists*: J.W.T. Cohen Stuart, E.P. IJzerman, R. Jansen, W. Rozemeijer W. A. van der Reijden. **OLVG, Amsterdam**: *HIV treating physicians*: K. Brinkman\*, G.E.L. van den Berk, W.L. Blok, P.H.J. Frissen, K.D. Lettinga W.E.M. Schouten, J. Veenstra. *HIV nurse consultants*: C.J. Brouwer, G.F. Geerders, K. Hoeksema, M.J. Kleene, I.B. van der Meché, M. Spelbrink, A.J.M. Toonen, S. Wijnands. *HIV clinical virologists*: D. Kwa. *Data collection*: R. Regez (coordinator). **Radboudumc, Nijmegen**: *HIV treating physicians*: R. van Crevel\*, M. Keuter, A.J.A.M. van der Ven, H.J.M. ter Hofstede, A.S.M. Dofferhoff, S.S.V. Henriët, M. van de Flier, K. van Aerde, J. Hoogerwerf. *HIV nurse consultants*: M. Albers, K.J.T. Grintjes-Huisman, M. de Haan, M. Marneef, A. Hairwassers. *HIV clinical virologists/chemists*: J. Rahamat-Langendoen, F.F. Stelma. *HIV clinical pharmacology consultant*: D. Burger. **Rijnstate, Arnhem**: *HIV treating physicians*: E.H. Gisolf\*, R.J. Hassing, M. Claassen. *HIV nurse consultants*: G. ter Beest, P.H.M. van Bentum, N. Langebeek. *HIV clinical virologists/chemists*: R. Tiemessen, C.M.A. Swanink. **Spaarne Gasthuis, Haarlem**: *HIV treating physicians*: S.F.L. van Lelyveld\*, R. Soetekouw. *HIV nurse consultants*: L.M.M. van der Pijlt, J. van der Swaluw. *Data collection*: N. Bermon. *HIV clinical virologists/chemists*: W.A. van der Reijden, R. Jansen, B.L. Herpers, D.Veenendaal. **Medisch Centrum Jan van Goyen, Amsterdam**: *HIV treating physicians*: D.W.M. Verhagen. *HIV nurse consultants*: M. van Wijk. **Universitair Medisch Centrum Groningen, Groningen**: *HIV treating physicians*: W.F.W. Bierman\*, M. Bakker, J. Kleinnijenhuis, E. Kloeze, E.H. Scholvinck, Y. Stienstra, C.L. Vermont, K.R. Wilting, M. Wouthuyzen-Bakker. *HIV nurse consultants*: A. Boonstra, H. de Groot-de Jonge, P.A. van der Meulen, D.A. de Weerd. *HIV clinical virologists/chemists*: H.G.M. Niesters, C.C. van Leer-Buter, M. Knoester. **Universitair Medisch Centrum Utrecht, Utrecht**: *HIV treating physicians*: A.I.M. Hoepelman\*, J.E. Arends, R.E. Barth, A.H.W. Bruns, P.M. Ellerbroek, T. Mudrikova, J.J. Oosterheert, E.M. Schadd, M.W.M. Wassenberg, M.A.D. van Zoelen. *HIV nurse consultants*: K. Aarsman, D.H.M. van Elst-Laurijssen, I. de Kroon, C.S.A.M. van Rooijen. *Data collection*: M. van Berkel, C.S.A.M. van Rooijen. *HIV clinical virologists/chemists*: R. Schuurman, F. Verduyn-Lunel, A.M.J. Wensing. **VUmc, Amsterdam**: *HIV treating physicians*: E.J.G. Peters\*, M.A. van Agtmael, M. Bomers. *HIV nurse consultants*: M. Heitmuller, L.M. Laan. *HIV clinical virologists/chemists*: C.W. Ang, R. van Houdt, A.M. Pettersson, C.M.J.E. Vandenbroucke-Grauls. **Wilhelmina**

**Kinderziekenhuis, UMC Utrecht, Utrecht:** *HIV treating physicians:* L.J. Bont, S.P.M. Geelen, T.F.W. Wolfs. *HIV nurse consultants:* N. Nauta.

**COORDINATING CENTRE**

*Director:* P. Reiss. *Data analysis:* D.O. Bezemer, A.I. van Sighem, C. Smit, F.W.M.N. Wit, T.S. Boender. *Data management and quality control:* S. Zaheri, M. Hillebregt, A. de Jong. *Data monitoring:* D. Bergsma, S. Grivell, A. Jansen, M. Raethke, R. Meijering, T. Rutkens. *Data collection:* L. de Groot, M. van den Akker, Y. Bakker, M. Bezemer, E. Claessen, A. El Berkaoui, J. Geerlinks, J. Koops, E. Kruijne, C. Lodewijk, R. van der Meer, L. Munjishvili, F. Paling, B. Peeck, C. Ree, R. Regtop, Y. Ruijs, M. Schoorl, A. Timmerman, E. Tuijn, L. Veenenberg, S. van der Vliet, A. Wisse, E.C. de Witte, T. Woudstra. *Patient registration:* B. Tuk.
